# Supplementary material for: An Analysis of the Effect of Activation Temperature and Crack Geometry on the Healing Efficiency of Polycaprolactone (PCL)/Epoxy Blends
Source: MDPI journal article supplement (doi:10.3390/polym15020336), 2023-01-09
Supplement: s1 [file s1]

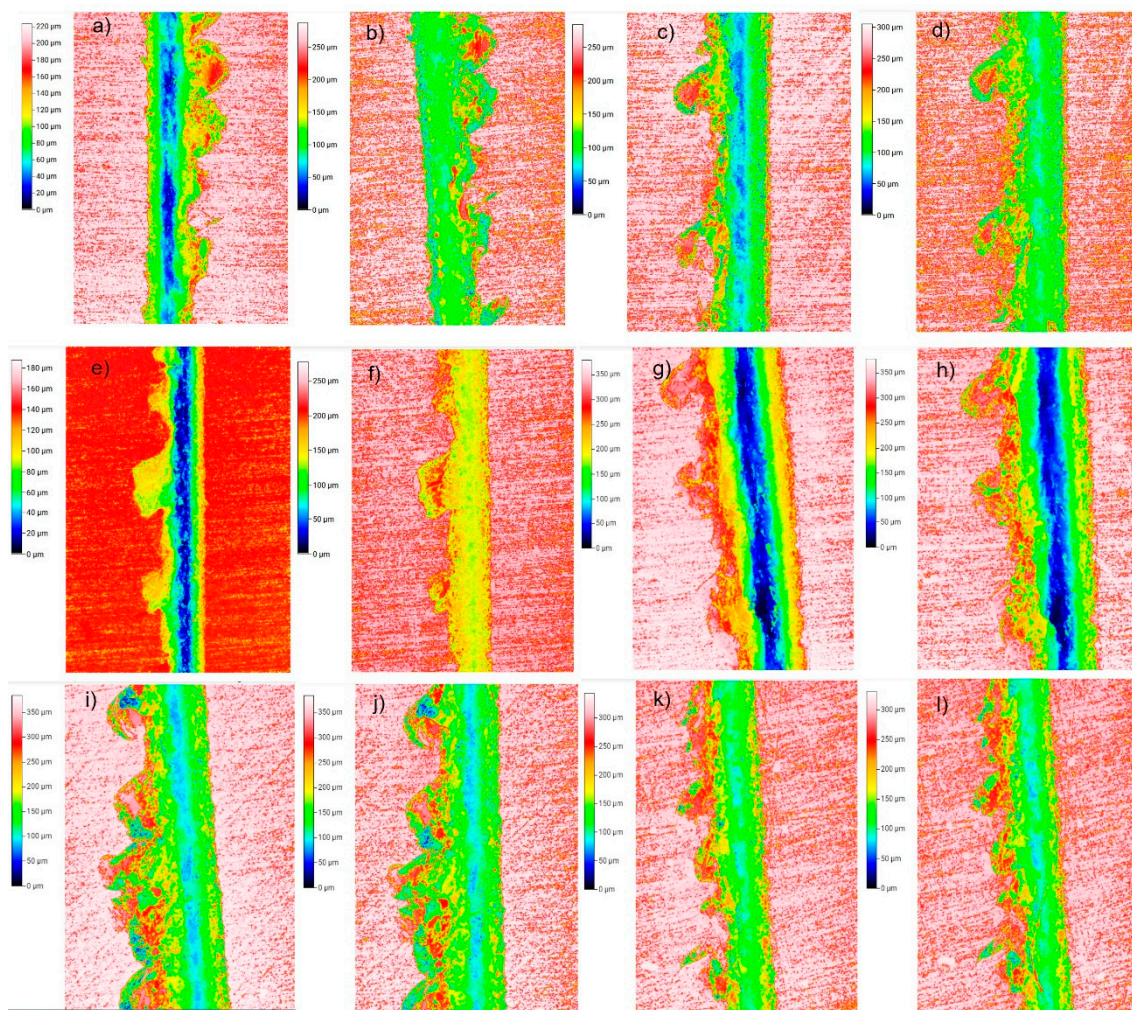

Figure S1. Images of optical profilometry for PCL/epoxy blends with 10 % wt PCL before and after the self-healing process after 15 minutes of heating at: (a), (b) 110 °C , (c), (d) 130 °C, (e), (f) 150 °C and PCL/epoxy blends with 5 % wt PCL (g), (h) 110 °C , (i), (j) 130 °C, (k), (l) 150 °C.
